# Supplementary material for: Solution-based low-temperature synthesis of germanium nanorods and nanowires
Source: PubMed Central journal article supplement (PMC6060878; doi:10.1007/s00706-018-2191-1), 2018-05-02
Supplement: 706_2018_2191_MOESM1_ESM.pdf [file 706_2018_2191_MOESM1_ESM.pdf]

## Solution-based Low Temperature Synthesis of Germanium Nanorods and Nanowires

Patrik Pertl • Michael S. Seifner • Christopher Herzig • Andreas Limbeck • Masiar Sistani • Alois Lugstein • Sven Barth\*

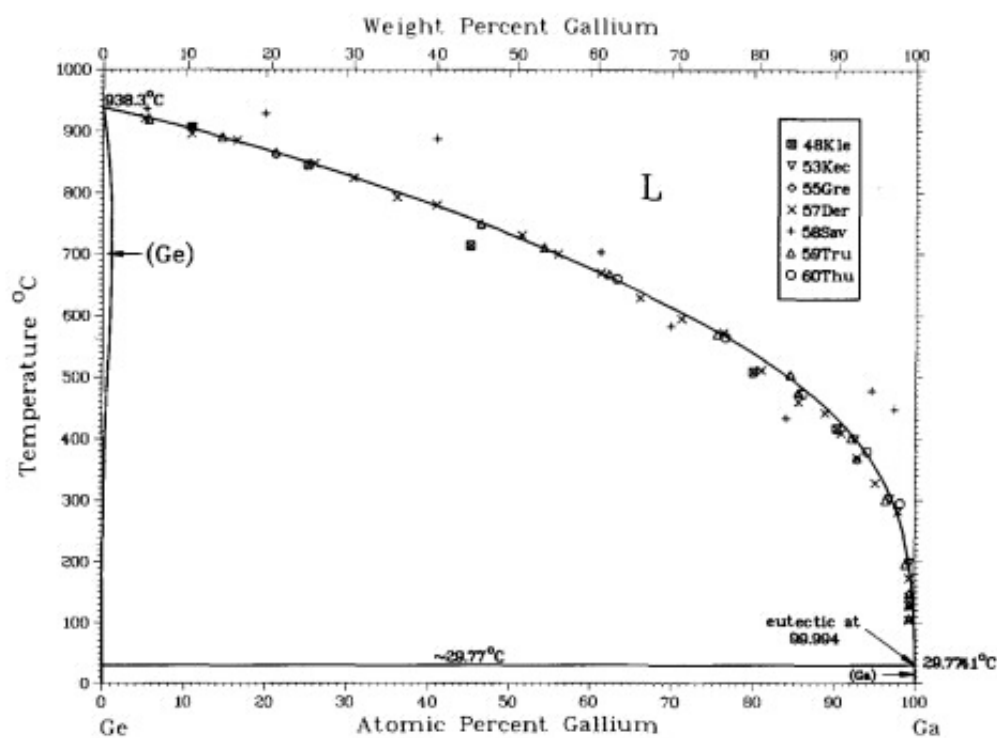

**Figure S1:** Ge-Ga phase diagram according to Olesinski *et al.* Reprinted with permission of Springer.<sup>1</sup>

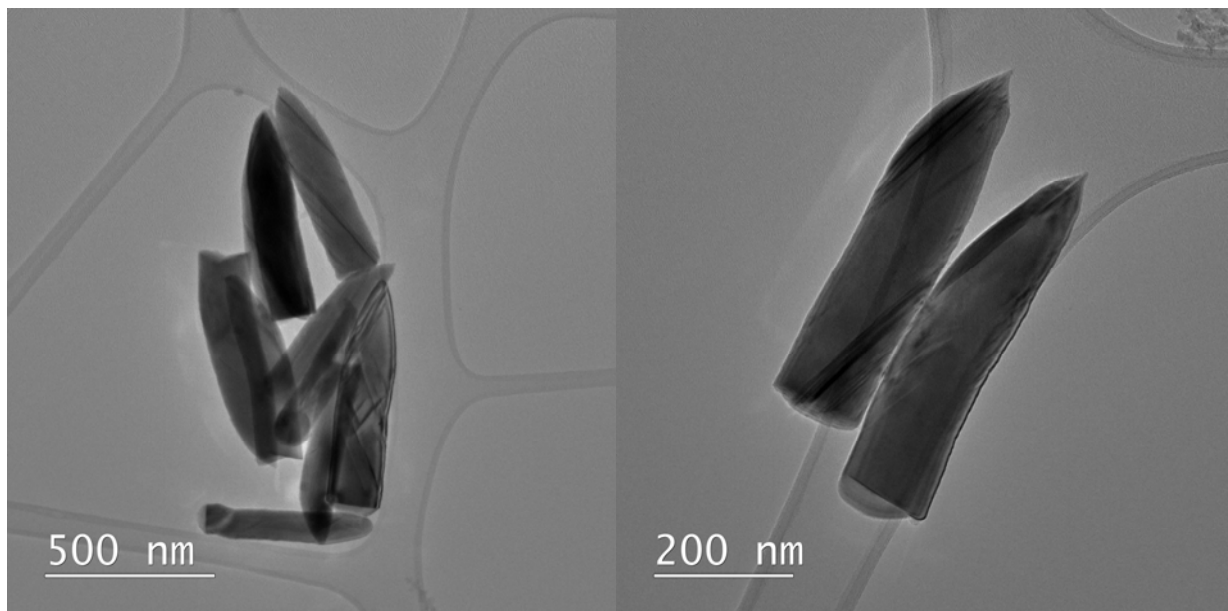

**Figure S2:** Ge NRs grown at 170 °C for 12h. The Ga particle has been dissolved in 2 % HF solution prior to the imaging. The NRs show a considerable density of defects such as stacking faults and twins.

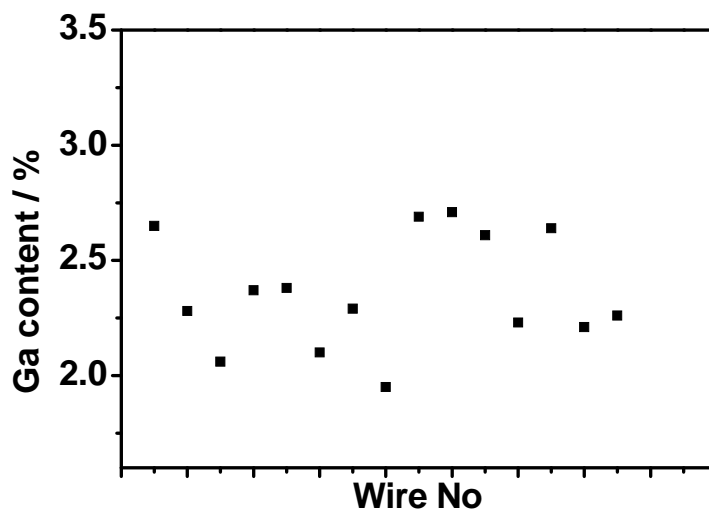

**Figure S3:** Overview showing the Ga content determined by EDX analysis of a number of Ge NRs prepared at 210 °C for 6h. An average value can be determined to be  $2.36 \pm 0.25$  at. %

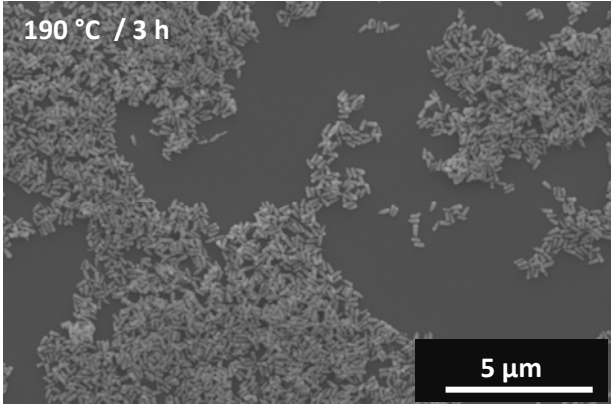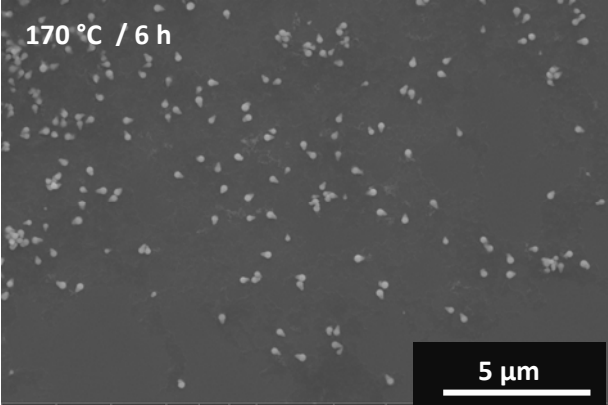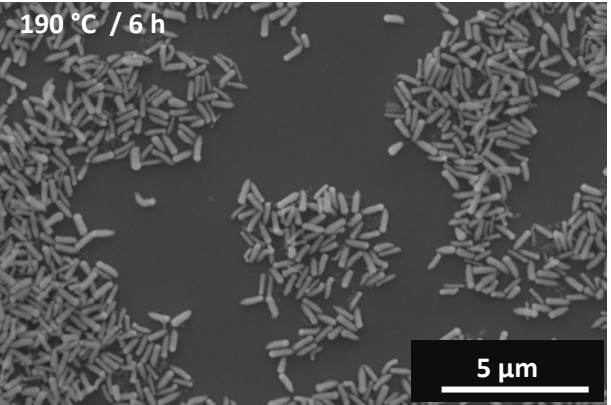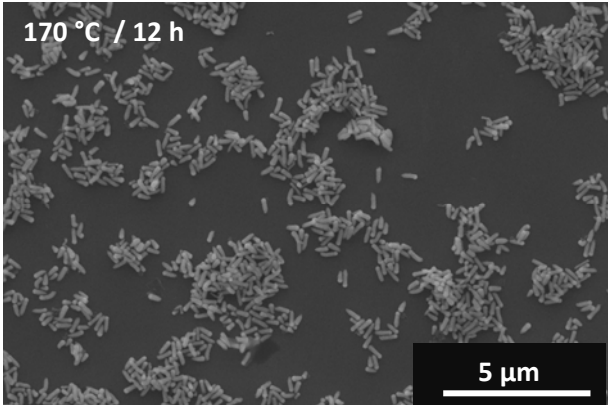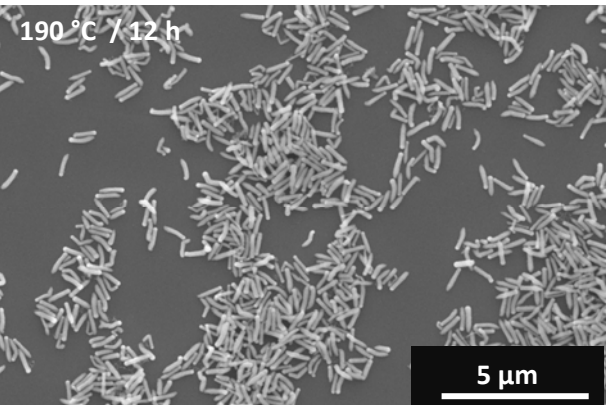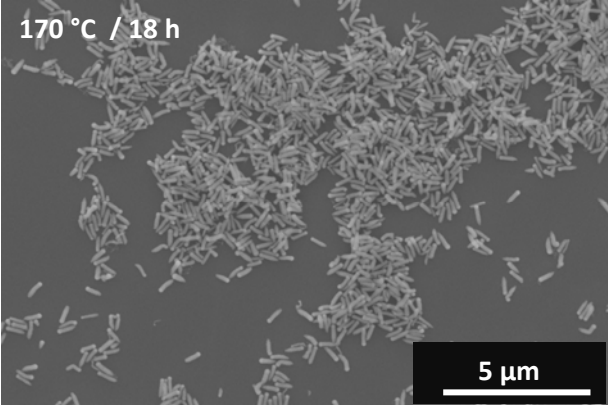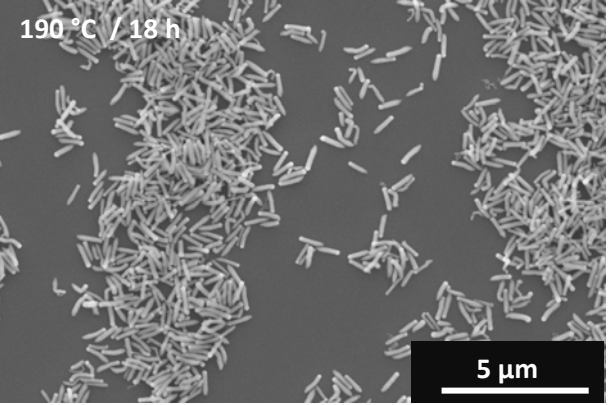

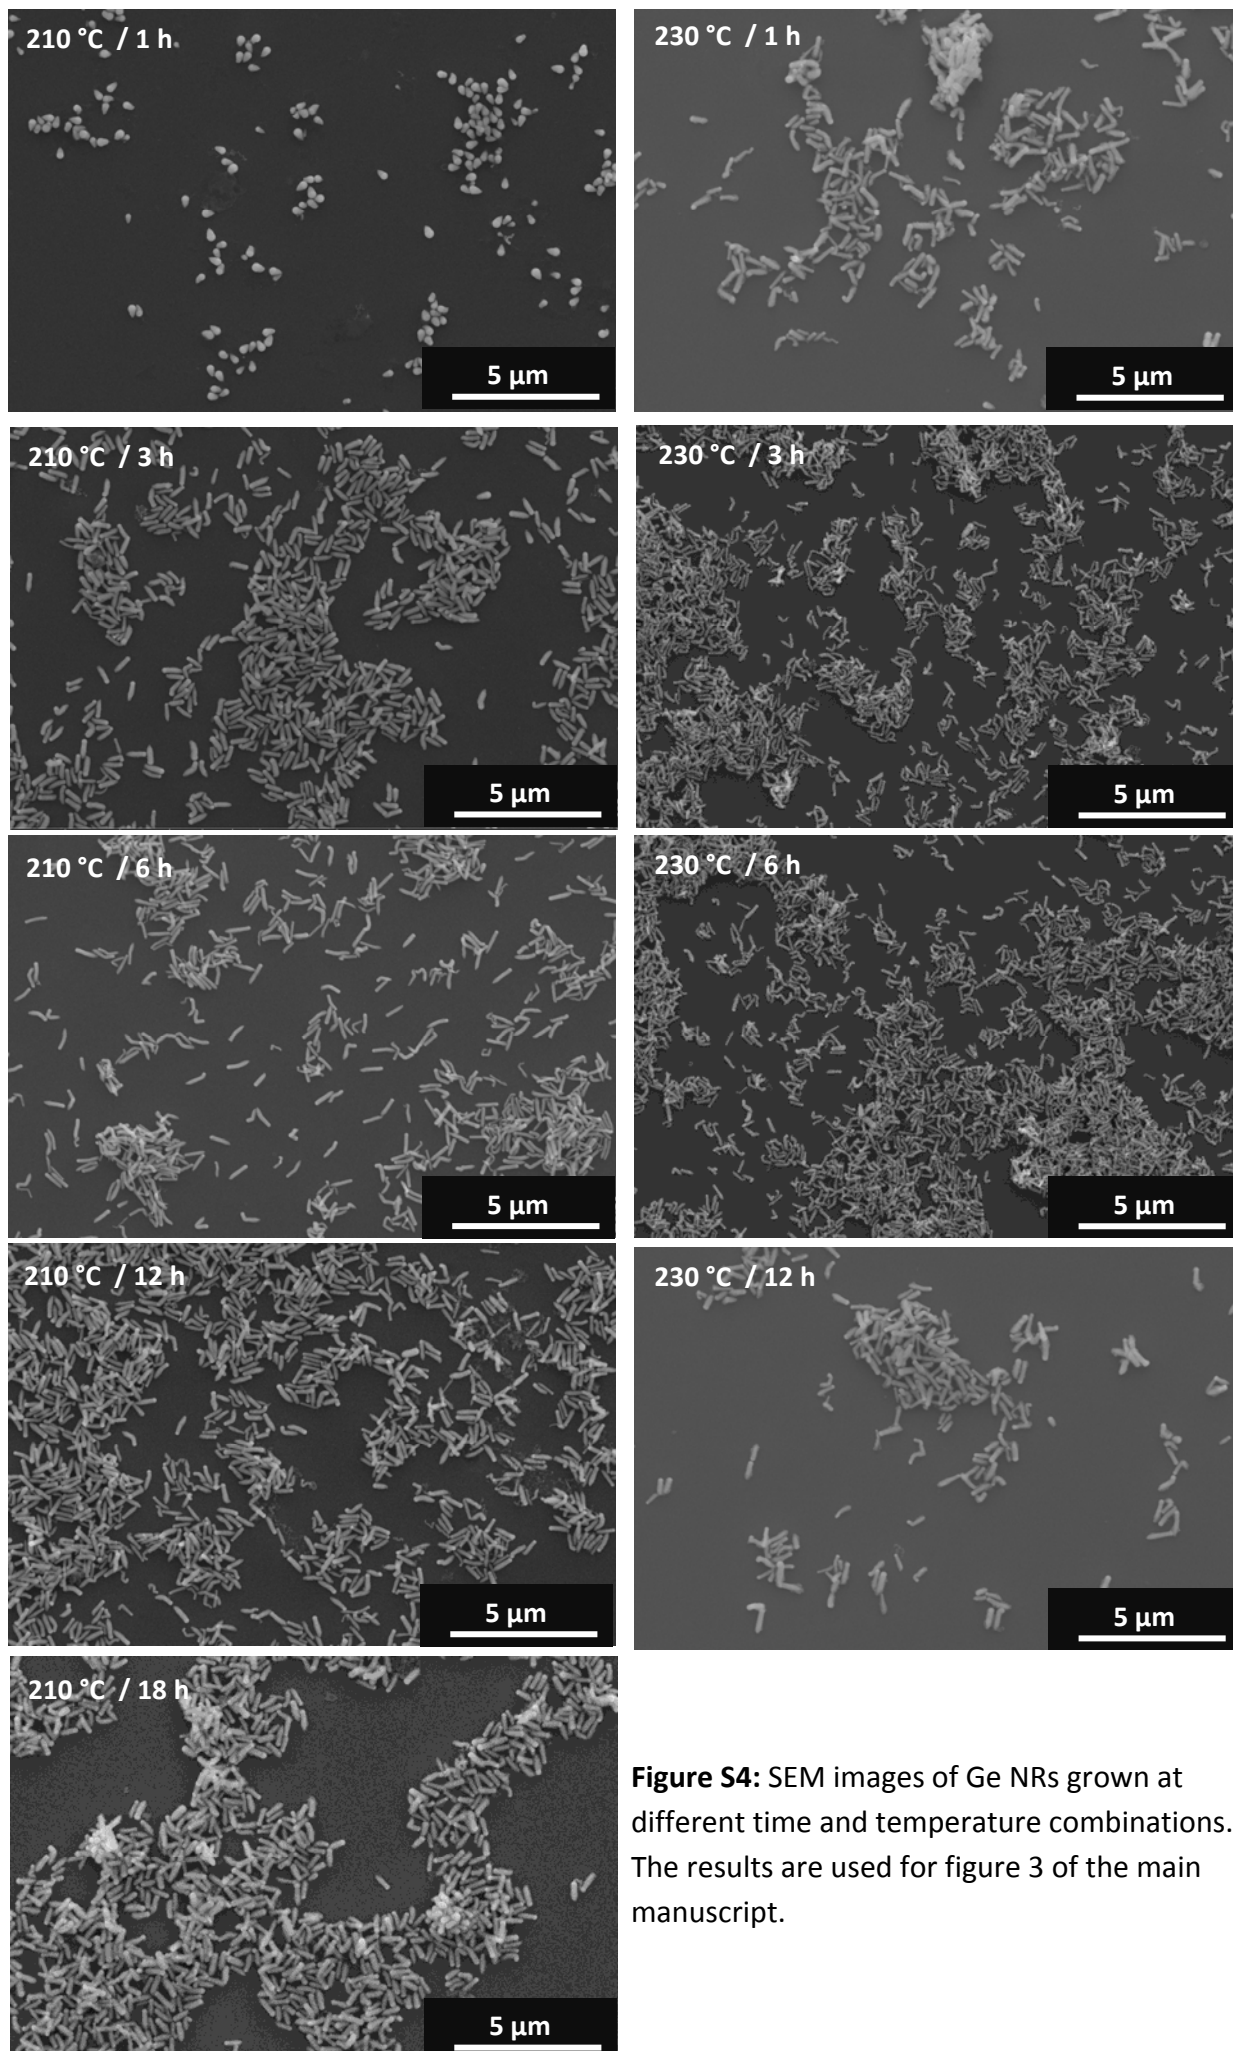

**Figure S4:** SEM images of Ge NRs grown at different time and temperature combinations. The results are used for figure 3 of the main manuscript.

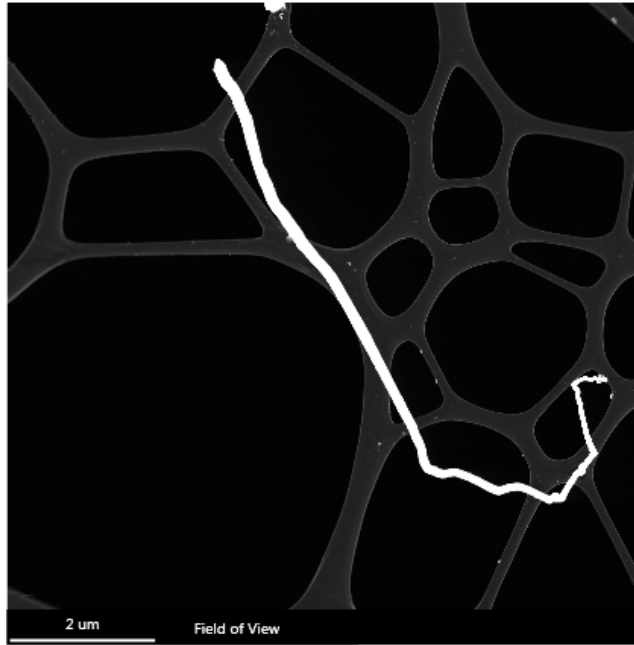

**Figure S5:** Dark field TEM image of a Ga-seeded Ge NW demonstrating a diameter reduction due to the limited Ga content and incorporation of the Ga in the Ge crystal.

## LA-ICP-MS Measurement Description:

For quantification liquid standard solutions were used. To introduce these liquid solutions via the laser ablation system a previously reported technique of dried droplets was used. Therefore microgrooves with 50  $\mu\text{m}$  diameter and a few mm length were produced using the same laser system as to introduce the sample into the ICP-MS. These microgrooves were filled with liquid standard solutions. During the measurement the cavity was ablated with a laser spot size of 100  $\mu\text{m}$  to ensure complete ablation of the dried residues. For data treatment only elemental ratios were used resulting in a linear correlation of the elemental concentration ratios (Ga/Ge) with signal intensity.

| Laser ablation system               | NWR213,<br>New Wave Research | ICP-MS                                          | iCAP Q,<br>Thermo Scientific                           |
|-------------------------------------|------------------------------|-------------------------------------------------|--------------------------------------------------------|
| Type of laser                       | Nd:YAG 213 nm                | RF power [W]                                    | 1450                                                   |
| Ablation mode                       | Raster (lines)               | Carrier gas flow rate [ $\text{L min}^{-1}$ ]   | 0.6                                                    |
| Beam diameter [ $\mu\text{m}$ ]     | 50* / 100                    | Plasma gas flow rate [ $\text{L min}^{-1}$ ]    | 14                                                     |
| Fluence [ $\text{J cm}^{-2}$ ]      | 2,4* / 18,9                  | Auxiliary gas flow rate [ $\text{L min}^{-1}$ ] | 0.8                                                    |
| Frequency [Hz]                      | 20                           | Acquisition time [ms]                           | 10                                                     |
| Scan speed [ $\mu\text{m s}^{-1}$ ] | 150                          | Cones                                           | Ni                                                     |
| He gas flow [ $\text{L min}^{-1}$ ] | 0.65                         | Measured isotopes                               | $^{69}\text{Ga}$ , $^{71}\text{Ga}$ , $^{76}\text{Ge}$ |

\*Parameters used for preparation of the microgrooves

## References

1. R. W. Olesinski and G. J. Abbaschian, *Bulletin of Alloy Phase Diagrams*, 1985, **6**, 258-262.
